# Supplementary material for: Butterfly Species Richness in Selected West Albertine Rift Forests
Source: Hindawi journal article supplement (doi:10.1155/2012/578706), 2012-01-01
Supplement: f1 [file 578706.f1.pdf]

## Species list for the different forests

| Butterfly family,<br>sub-family and species | Kal | Itw | Bu<br>g | Kis | Bu<br>d | Rw<br>e | Ech | Maf | Ka<br>g | Mat | Kit | Kas | Se<br>m | Kib | Bwi | Kei | Era |
|---------------------------------------------|-----|-----|---------|-----|---------|---------|-----|-----|---------|-----|-----|-----|---------|-----|-----|-----|-----|
| <b>Papilionidae</b>                         |     |     |         |     |         |         |     |     |         |     |     |     |         |     |     |     |     |
| <b>Papilioninae</b>                         |     |     |         |     |         |         |     |     |         |     |     |     |         |     |     |     |     |
| <i>Papilio cynorta</i>                      | 1   | 0   | 1       | 0   | 1       | 0       | 0   | 0   | 1       | 0   | 0   | 1   | 1       | 1   | 1   | 0   | 0   |
| <i>Papilio dardanus</i>                     | 1   | 1   | 1       | 0   | 1       | 0       | 0   | 0   | 1       | 1   | 1   | 1   | 1       | 1   | 1   | 0   | 0   |
| <i>Papilio hesperus</i>                     | 1   | 0   | 0       | 0   | 0       | 0       | 0   | 0   | 0       | 0   | 0   | 1   | 0       | 0   | 1   | 0   | 0   |
| <i>Papilio interjecta</i>                   | 1   | 0   | 0       | 0   | 0       | 0       | 0   | 0   | 0       | 0   | 0   | 0   | 0       | 0   | 0   | 0   | 0   |
| <i>Papilio lormieri</i>                     | 1   | 1   | 1       | 0   | 1       | 0       | 0   | 0   | 1       | 1   | 1   | 1   | 1       | 1   | 1   | 0   | 0   |
| <i>Papilio mechowii</i>                     | 1   | 0   | 1       | 0   | 1       | 0       | 0   | 0   | 1       | 0   | 1   | 1   | 1       | 1   | 0   | 0   | 0   |
| <i>Papilio nobilis</i>                      | 1   | 0   | 1       | 0   | 0       | 0       | 0   | 0   | 0       | 0   | 0   | 1   | 1       | 1   | 0   | 0   | 0   |
| <i>Papilio phorcas</i>                      | 1   | 1   | 1       | 1   | 1       | 0       | 0   | 0   | 1       | 0   | 0   | 1   | 1       | 1   | 1   | 0   | 0   |
| <i>Papilio rex</i>                          | 1   | 0   | 0       | 0   | 0       | 0       | 0   | 0   | 0       | 0   | 0   | 0   | 0       | 1   | 1   | 0   | 0   |
| <i>Papilio sosia</i>                        | 1   | 0   | 0       | 0   | 0       | 0       | 0   | 0   | 1       | 0   | 1   | 1   | 1       | 0   | 0   | 0   | 0   |
| <i>Papilio zoroastres</i>                   | 1   | 1   | 0       | 0   | 0       | 0       | 0   | 0   | 1       | 1   | 1   | 1   | 0       | 1   | 0   | 0   | 0   |
| <i>Papilio bromius</i>                      | 0   | 1   | 1       | 0   | 1       | 0       | 0   | 0   | 1       | 1   | 1   | 1   | 1       | 1   | 0   | 0   | 0   |
| <i>Papilio demodocus</i>                    | 0   | 1   | 1       | 0   | 1       | 0       | 0   | 0   | 1       | 1   | 1   | 1   | 1       | 1   | 1   | 0   | 0   |
| <i>Papilio nireus</i>                       | 0   | 1   | 1       | 0   | 1       | 0       | 0   | 0   | 1       | 0   | 0   | 1   | 1       | 1   | 1   | 0   | 0   |
| <i>Papilio policles</i>                     | 0   | 1   | 0       | 0   | 0       | 0       | 0   | 0   | 0       | 0   | 0   | 0   | 0       | 0   | 0   | 0   | 0   |
| <i>Papilio jacksoni</i>                     | 0   | 0   | 0       | 0   | 0       | 1       | 1   | 0   | 0       | 0   | 0   | 0   | 0       | 0   | 1   | 0   | 0   |
| <i>Papilio charopsus</i>                    | 0   | 0   | 0       | 0   | 0       | 0       | 0   | 0   | 1       | 0   | 0   | 1   | 1       | 1   | 0   | 0   | 0   |
| <i>Papilio mackinnoni</i>                   | 0   | 0   | 0       | 0   | 0       | 0       | 0   | 0   | 0       | 0   | 0   | 0   | 1       | 0   | 1   | 0   | 0   |
| <i>Papilio zenobia</i>                      | 0   | 0   | 0       | 0   | 0       | 0       | 0   | 0   | 0       | 0   | 0   | 0   | 1       | 0   | 0   | 0   | 0   |
| <i>Papilio leucotaenia</i>                  |     |     |         |     |         |         |     |     |         |     |     |     |         |     |     |     |     |
| <i>Graphium angolanus</i>                   | 0   | 0   | 0       | 0   | 1       | 0       | 0   | 0   | 0       | 0   | 0   | 0   | 1       | 0   | 0   | 1   | 1   |







| <b>Butterfly family,<br/>sub-family and species</b> | <b>Kal</b> | <b>Itw</b> | <b>Bu<br/>g</b> | <b>Kis</b> | <b>Bu<br/>d</b> | <b>Rw<br/>e</b> | <b>Ech</b> | <b>Maf</b> | <b>Ka<br/>g</b> | <b>Mat</b> | <b>Kit</b> | <b>Kas</b> | <b>Se<br/>m</b> | <b>Kib</b> | <b>Bwi</b> | <b>Kei</b> | <b>Era</b> |
|-----------------------------------------------------|------------|------------|-----------------|------------|-----------------|-----------------|------------|------------|-----------------|------------|------------|------------|-----------------|------------|------------|------------|------------|
| <i>Pentila inconspicua</i>                          | 1          | 0          | 0               | 0          | 0               | 0               | 0          | 0          | 0               | 0          | 0          | 0          | 1               | 0          | 0          | 0          | 0          |
| <i>Pentila pauli</i>                                | 1          | 0          | 0               | 0          | 0               | 0               | 0          | 0          | 0               | 0          | 0          | 0          | 1               | 0          | 0          | 1          | 0          |
| <i>Pentila umagiana</i>                             | 0          | 0          | 0               | 0          | 0               | 0               | 0          | 0          | 0               | 0          | 0          | 0          | 1               | 0          | 0          | 0          | 0          |
| <i>Liptena xanthostola</i>                          | 1          | 0          | 0               | 0          | 0               | 0               | 0          | 0          | 0               | 0          | 0          | 0          | 1               | 1          | 0          | 0          | 0          |
| <i>Liptena praestans</i>                            | 0          | 0          | 0               | 0          | 0               | 0               | 0          | 0          | 0               | 0          | 0          | 0          | 1               | 0          | 0          | 0          | 0          |
| <i>Tetrarhanis ilma</i>                             | 1          | 0          | 1               | 0          | 0               | 0               | 0          | 0          | 0               | 1          | 0          | 1          | 1               | 0          | 0          | 0          | 0          |
| <i>Tetrarhanis diversa</i>                          | 0          | 0          | 0               | 0          | 0               | 0               | 0          | 0          | 0               | 0          | 0          | 0          | 0               | 0          | 0          | 1          | 0          |
| <i>Ptelina carnuta</i>                              | 0          | 0          | 1               | 0          | 0               | 0               | 0          | 0          | 0               | 0          | 0          | 0          | 0               | 0          | 0          | 0          | 0          |
| <i>Telipna nyanzi</i>                               | 0          | 0          | 1               | 0          | 0               | 0               | 0          | 0          | 0               | 0          | 1          | 0          | 1               | 0          | 0          | 0          | 0          |
| <i>Telipna aurivillii</i>                           | 0          | 0          | 0               | 0          | 0               | 0               | 0          | 0          | 0               | 0          | 0          | 0          | 1               | 0          | 0          | 0          | 0          |
| <i>Telipna erica</i>                                | 0          | 0          | 0               | 0          | 0               | 0               | 0          | 0          | 0               | 0          | 0          | 0          | 1               | 0          | 0          | 0          | 0          |
| <i>Telipna sanguinea</i>                            | 0          | 0          | 0               | 0          | 0               | 0               | 0          | 0          | 0               | 0          | 0          | 0          | 1               | 0          | 0          | 0          | 0          |
| <i>Ornipholidotus overleiti</i>                     | 0          | 0          | 1               | 0          | 0               | 0               | 0          | 0          | 0               | 1          | 0          | 0          | 1               | 0          | 0          | 0          | 0          |
| <i>Falcuna orientalis</i>                           | 0          | 0          | 1               | 0          | 0               | 0               | 0          | 0          | 0               | 0          | 0          | 0          | 0               | 0          | 0          | 0          | 0          |
| <i>Falcuna margarita</i>                            | 0          | 0          | 0               | 0          | 0               | 0               | 0          | 0          | 0               | 0          | 0          | 0          | 1               | 0          | 0          | 0          | 0          |
| <i>Epitola urania</i>                               | 0          | 0          | 0               | 0          | 0               | 0               | 0          | 0          | 0               | 1          | 0          | 0          | 0               | 0          | 0          | 0          | 0          |
| <i>Epitola cercenoides</i>                          | 0          | 0          | 0               | 0          | 0               | 0               | 0          | 0          | 0               | 0          | 0          | 0          | 1               | 0          | 0          | 0          | 0          |
| <i>Epitola cyanea</i>                               | 0          | 0          | 0               | 0          | 0               | 0               | 0          | 0          | 0               | 0          | 0          | 0          | 1               | 0          | 0          | 0          | 0          |
| <i>Epitola tumentia</i>                             | 0          | 0          | 0               | 0          | 0               | 0               | 0          | 0          | 0               | 0          | 0          | 0          | 1               | 0          | 0          | 0          | 0          |
| <i>Larnipoda tera</i>                               | 0          | 0          | 0               | 0          | 0               | 0               | 0          | 0          | 0               | 0          | 0          | 1          | 1               | 0          | 0          | 0          | 0          |
| <i>Larnipoda heindlmayri</i>                        | 0          | 0          | 0               | 0          | 0               | 0               | 0          | 0          | 0               | 0          | 0          | 0          | 1               | 0          | 0          | 0          | 0          |
| <i>Mimacraea krausen</i>                            | 0          | 0          | 0               | 0          | 0               | 0               | 0          | 0          | 0               | 0          | 0          | 0          | 1               | 0          | 0          | 0          | 0          |
| <i>Toxochitona sankuru</i>                          | 0          | 0          | 0               | 0          | 0               | 0               | 0          | 0          | 0               | 0          | 0          | 0          | 1               | 0          | 0          | 0          | 0          |
| <b>Mitelinae</b>                                    |            |            |                 |            |                 |                 |            |            |                 |            |            |            |                 |            |            |            |            |
| <i>Megalopulpus zymna</i>                           | 1          | 0          | 1               | 0          | 1               | 0               | 0          | 0          | 1               | 0          | 0          | 1          | 1               | 0          | 0          | 0          | 0          |



| Butterfly family,<br>sub-family and species | Kal | Itw | Bu<br>g | Kis | Bu<br>d | Rw<br>e | Ech | Maf | Ka<br>g | Mat | Kit | Kas | Se<br>m | Kib | Bwi | Kei | Era |
|---------------------------------------------|-----|-----|---------|-----|---------|---------|-----|-----|---------|-----|-----|-----|---------|-----|-----|-----|-----|
| <b>Polyommatainae</b>                       |     |     |         |     |         |         |     |     |         |     |     |     |         |     |     |     |     |
| <i>Anthene definita</i>                     | 1   | 0   | 1       | 0   | 0       | 0       | 0   | 0   | 0       | 0   | 0   | 1   | 0       | 0   | 1   | 0   | 0   |
| <i>Anthene indefinita</i>                   | 1   | 0   | 1       | 0   | 0       | 1       | 0   | 0   | 1       | 1   | 0   | 1   | 1       | 0   | 0   | 1   | 0   |
| <i>Anthene kersteni</i>                     | 1   | 0   | 1       | 0   | 0       | 0       | 0   | 0   | 1       | 0   | 0   | 1   | 1       | 1   | 0   | 0   | 0   |
| <i>Anthene larydas</i>                      | 1   | 0   | 1       | 0   | 1       | 0       | 0   | 0   | 1       | 1   | 0   | 0   | 1       | 1   | 0   | 0   | 0   |
| <i>Anthene ligures</i>                      | 1   | 0   | 1       | 0   | 1       | 0       | 0   | 0   | 1       | 0   | 0   | 0   | 1       | 0   | 0   | 0   | 0   |
| <i>Anthene rubricinctus</i>                 | 1   | 0   | 1       | 0   | 1       | 0       | 0   | 0   | 1       | 0   | 0   | 0   | 0       | 0   | 0   | 0   | 0   |
| <i>Anthene crawshayi</i>                    | 0   | 0   | 1       | 0   | 0       | 0       | 0   | 0   | 1       | 0   | 0   | 0   | 0       | 0   | 0   | 0   | 0   |
| <i>Anthene ituria</i>                       | 0   | 0   | 1       | 0   | 0       | 0       | 0   | 0   | 0       | 0   | 0   | 0   | 1       | 1   | 0   | 0   | 0   |
| <i>Anthene schoutdeni</i>                   | 0   | 0   | 1       | 0   | 0       | 1       | 0   | 0   | 0       | 0   | 0   | 0   | 0       | 1   | 0   | 0   | 0   |
| <i>Anthene hobleyi</i>                      | 0   | 0   | 0       | 0   | 1       | 1       | 0   | 0   | 0       | 0   | 0   | 0   | 0       | 0   | 1   | 0   | 0   |
| <i>Anthene liodes</i>                       | 0   | 0   | 0       | 0   | 1       | 0       | 0   | 0   | 0       | 0   | 0   | 0   | 0       | 0   | 0   | 0   | 0   |
| <i>Anthene lunulata</i>                     | 0   | 0   | 0       | 0   | 0       | 0       | 0   | 0   | 0       | 0   | 1   | 0   | 0       | 0   | 0   | 1   | 1   |
| <i>Anthene lysicles</i>                     | 0   | 0   | 0       | 0   | 0       | 0       | 0   | 0   | 0       | 0   | 0   | 1   | 0       | 0   | 0   | 0   | 0   |
| <i>Anthene seintillula</i>                  | 0   | 0   | 0       | 0   | 0       | 0       | 0   | 0   | 0       | 0   | 0   | 0   | 1       | 0   | 0   | 0   | 0   |
| <i>Anthene amarah</i>                       | 0   | 0   | 0       | 0   | 0       | 0       | 0   | 0   | 0       | 0   | 0   | 0   | 0       | 0   | 0   | 1   | 1   |
| <i>Cupidopsis cissus</i>                    | 1   | 0   | 0       | 0   | 0       | 0       | 0   | 0   | 0       | 0   | 0   | 1   | 0       | 0   | 0   | 1   | 0   |
| <i>Lampides boeticus</i>                    | 1   | 0   | 0       | 0   | 1       | 1       | 1   | 1   | 0       | 0   | 0   | 1   | 0       | 0   | 1   | 1   | 1   |
| <i>Cacyreus lingeus</i>                     | 1   | 0   | 1       | 0   | 1       | 0       | 1   | 1   | 1       | 0   | 1   | 1   | 1       | 0   | 1   | 1   | 0   |
| <i>Cacyreus palemon</i>                     | 0   | 0   | 0       | 0   | 0       | 1       | 1   | 1   | 0       | 0   | 0   | 0   | 0       | 0   | 1   | 0   | 0   |
| <i>Cacyreus andeondi</i>                    | 0   | 0   | 0       | 0   | 0       | 0       | 0   | 0   | 0       | 0   | 0   | 0   | 0       | 1   | 0   | 0   | 0   |
| <i>Harpencyreus marungensis</i>             | 1   | 0   | 0       | 0   | 0       | 0       | 1   | 1   | 0       | 0   | 0   | 1   | 0       | 0   | 1   | 0   | 0   |
| <i>Harpencyreus acquatorialis</i>           | 0   | 0   | 0       | 0   | 0       | 0       | 1   | 0   | 0       | 0   | 0   | 0   | 0       | 0   | 0   | 0   | 0   |
| <i>Harpencyreus argostriatus</i>            | 0   | 0   | 0       | 0   | 0       | 0       | 1   | 0   | 0       | 0   | 0   | 0   | 0       | 0   | 0   | 0   | 0   |
| <i>Harpencyreus reginaldi</i>               | 0   | 0   | 0       | 0   | 0       | 0       | 0   | 0   | 0       | 0   | 0   | 0   | 0       | 0   | 1   | 0   | 0   |

| <b>Butterfly family,<br/>sub-family and species</b> | <b>Kal</b> | <b>Itw</b> | <b>Bu<br/>g</b> | <b>Kis</b> | <b>Bu<br/>d</b> | <b>Rw<br/>e</b> | <b>Ech</b> | <b>Maf</b> | <b>Ka<br/>g</b> | <b>Mat</b> | <b>Kit</b> | <b>Kas</b> | <b>Se<br/>m</b> | <b>Kib</b> | <b>Bwi</b> | <b>Kei</b> | <b>Era</b> |
|-----------------------------------------------------|------------|------------|-----------------|------------|-----------------|-----------------|------------|------------|-----------------|------------|------------|------------|-----------------|------------|------------|------------|------------|
| <i>Leptotes sp.</i>                                 | 1          | 1          | 1               | 0          | 1               | 0               | 0          | 0          | 0               | 1          | 1          | 1          | 1               | 1          | 0          | 1          | 1          |
| <i>Tuxentius margarateceus</i>                      | 1          | 0          | 1               | 0          | 1               | 1               | 1          | 0          | 0               | 0          | 1          | 1          | 1               | 1          | 1          | 0          | 0          |
| <i>Tuxentius cretosus</i>                           | 0          | 0          | 0               | 0          | 1               | 0               | 0          | 1          | 0               | 0          | 0          | 0          | 0               | 0          | 0          | 1          | 1          |
| <i>Zizeeria knysna</i>                              | 1          | 0          | 1               | 1          | 1               | 0               | 0          | 0          | 1               | 0          | 0          | 0          | 0               | 0          | 0          | 1          | 0          |
| <i>Zizula hylax</i>                                 | 1          | 1          | 1               | 0          | 1               | 0               | 1          | 0          | 0               | 1          | 1          | 1          | 1               | 1          | 1          | 0          | 0          |
| <i>Azonus mirza</i>                                 | 1          | 0          | 1               | 0          | 1               | 0               | 0          | 0          | 1               | 0          | 0          | 0          | 0               | 0          | 1          | 0          | 0          |
| <i>Azonus natalensis</i>                            | 0          | 1          | 1               | 1          | 1               | 0               | 0          | 0          | 1               | 0          | 1          | 1          | 1               | 1          | 0          | 1          | 1          |
| <i>Azonus isis</i>                                  | 0          | 0          | 1               | 0          | 1               | 0               | 0          | 0          | 1               | 0          | 1          | 0          | 1               | 1          | 0          | 0          | 0          |
| <i>Azonus jesous</i>                                | 0          | 0          | 1               | 0          | 0               | 0               | 0          | 0          | 1               | 0          | 0          | 0          | 0               | 0          | 0          | 0          | 1          |
| <i>Azonus moriqua</i>                               | 0          | 0          | 1               | 0          | 0               | 0               | 0          | 0          | 0               | 0          | 0          | 0          | 0               | 0          | 0          | 0          | 1          |
| <i>Eicochryspus hippocrates</i>                     | 1          | 0          | 1               | 0          | 1               | 0               | 0          | 0          | 1               | 0          | 1          | 1          | 1               | 1          | 0          | 0          | 0          |
| <i>Eicochryspus malathana</i>                       | 0          | 0          | 0               | 0          | 1               | 0               | 0          | 0          | 0               | 0          | 0          | 1          | 0               | 0          | 0          | 1          | 1          |
| <i>Eicochryspus alberici</i>                        | 0          | 0          | 0               | 0          | 0               | 0               | 0          | 0          | 0               | 0          | 0          | 0          | 1               | 0          | 0          | 0          | 0          |
| <i>Eicochryspus nandianus</i>                       | 0          | 0          | 0               | 0          | 0               | 0               | 0          | 0          | 0               | 0          | 0          | 0          | 0               | 0          | 0          | 1          | 0          |
| <i>Eicochryspus albistriatus</i>                    | 0          | 0          | 0               | 0          | 0               | 0               | 0          | 0          | 0               | 0          | 0          | 0          | 0               | 0          | 0          | 1          | 0          |
| <i>Eicochryspus brunneus</i>                        | 0          | 0          | 0               | 0          | 0               | 0               | 0          | 0          | 0               | 0          | 0          | 0          | 0               | 0          | 0          | 0          | 1          |
| <i>Uranotauma anthinori</i>                         | 0          | 1          | 1               | 0          | 0               | 1               | 0          | 0          | 0               | 0          | 0          | 0          | 0               | 0          | 1          | 0          | 0          |
| <i>Uranotauma falkensteini</i>                      | 0          | 1          | 1               | 0          | 1               | 0               | 0          | 0          | 1               | 1          | 0          | 1          | 0               | 1          | 0          | 0          | 0          |
| <i>Uranotauma delatorum</i>                         | 0          | 0          | 1               | 0          | 0               | 1               | 0          | 0          | 0               | 0          | 0          | 0          | 0               | 0          | 0          | 0          | 0          |
| <i>Uranotauma herista</i>                           | 0          | 0          | 0               | 0          | 0               | 0               | 0          | 0          | 0               | 1          | 1          | 1          | 0               | 0          | 0          | 0          | 0          |
| <i>Uranotauma nubifer</i>                           | 0          | 0          | 0               | 0          | 0               | 0               | 0          | 0          | 0               | 0          | 0          | 0          | 0               | 1          | 1          | 0          | 0          |
| <i>Neurellipes chryseoticus</i>                     | 0          | 0          | 1               | 0          | 0               | 0               | 0          | 0          | 0               | 0          | 0          | 0          | 1               | 0          | 0          | 0          | 0          |
| <i>Neurellipes standingeri</i>                      | 0          | 0          | 0               | 0          | 0               | 0               | 0          | 0          | 0               | 0          | 0          | 0          | 1               | 0          | 0          | 0          | 0          |
| <i>Pseudonacaduba aethiops</i>                      | 0          | 0          | 1               | 0          | 1               | 0               | 0          | 0          | 0               | 0          | 0          | 0          | 1               | 0          | 0          | 0          | 0          |
| <i>Pseudonacaduba sichela</i>                       | 0          | 0          | 0               | 0          | 0               | 0               | 0          | 0          | 0               | 0          | 1          | 0          | 1               | 0          | 0          | 1          | 0          |







| <b>Butterfly family,<br/>sub-family and species</b> | <b>Kal</b> | <b>Itw</b> | <b>Bu<br/>g</b> | <b>Kis</b> | <b>Bu<br/>d</b> | <b>Rw<br/>e</b> | <b>Ech</b> | <b>Maf</b> | <b>Ka<br/>g</b> | <b>Mat</b> | <b>Kit</b> | <b>Kas</b> | <b>Se<br/>m</b> | <b>Kib</b> | <b>Bwi</b> | <b>Kei</b> | <b>Era</b> |
|-----------------------------------------------------|------------|------------|-----------------|------------|-----------------|-----------------|------------|------------|-----------------|------------|------------|------------|-----------------|------------|------------|------------|------------|
| <i>Bicyclus mesogena</i>                            | 1          | 0          | 1               | 0          | 1               | 0               | 1          | 0          | 1               | 0          | 0          | 1          | 1               | 0          | 1          | 0          | 0          |
| <i>Bicyclus mollitia</i>                            | 1          | 1          | 1               | 0          | 1               | 0               | 0          | 0          | 1               | 1          | 0          | 1          | 1               | 1          | 1          | 1          | 0          |
| <i>Bicyclus safitza</i>                             | 1          | 1          | 1               | 1          | 1               | 0               | 0          | 0          | 0               | 0          | 0          | 1          | 1               | 1          | 0          | 1          | 1          |
| <i>Bicyclus sambulos</i>                            | 1          | 1          | 1               | 0          | 1               | 0               | 0          | 0          | 1               | 0          | 0          | 1          | 1               | 0          | 0          | 0          | 0          |
| <i>Bicyclus sandace</i>                             | 1          | 0          | 1               | 1          | 1               | 0               | 0          | 0          | 1               | 0          | 0          | 1          | 1               | 1          | 1          | 0          | 1          |
| <i>Bicyclus sebetus</i>                             | 1          | 0          | 1               | 0          | 1               | 0               | 0          | 0          | 1               | 0          | 0          | 1          | 1               | 1          | 0          | 0          | 0          |
| <i>Bicyclus smithi</i>                              | 1          | 1          | 1               | 0          | 1               | 0               | 0          | 0          | 1               | 1          | 0          | 1          | 1               | 1          | 0          | 0          | 0          |
| <i>Bicyclus sophrosyne</i>                          | 1          | 1          | 1               | 1          | 1               | 0               | 0          | 0          | 1               | 0          | 1          | 1          | 1               | 1          | 1          | 0          | 1          |
| <i>Bicyclus uniformis</i>                           | 1          | 0          | 0               | 0          | 1               | 0               | 0          | 0          | 0               | 0          | 0          | 1          | 1               | 1          | 1          | 0          | 0          |
| <i>Bicyclus alboplagus</i>                          | 0          | 1          | 1               | 0          | 0               | 0               | 0          | 0          | 0               | 0          | 0          | 0          | 1               | 0          | 1          | 0          | 0          |
| <i>Bicyclus saussurei</i>                           | 0          | 1          | 1               | 0          | 0               | 0               | 0          | 0          | 1               | 0          | 1          | 1          | 0               | 1          | 1          | 0          | 0          |
| <i>Bicyclus campus</i>                              | 0          | 1          | 1               | 0          | 0               | 0               | 0          | 0          | 1               | 1          | 0          | 1          | 1               | 1          | 0          | 1          | 1          |
| <i>Bicyclus milyas</i>                              | 0          | 0          | 1               | 0          | 0               | 0               | 0          | 0          | 0               | 0          | 0          | 0          | 0               | 0          | 0          | 0          | 1          |
| <i>Bicyclus vulgaris</i>                            | 0          | 0          | 1               | 0          | 1               | 1               | 1          | 0          | 1               | 0          | 1          | 1          | 1               | 1          | 0          | 0          | 0          |
| <i>Bicyclus anynana</i>                             | 0          | 0          | 0               | 0          | 1               | 0               | 0          | 0          | 0               | 0          | 0          | 0          | 0               | 0          | 0          | 0          | 1          |
| <i>Bicyclus sanaos</i>                              | 0          | 0          | 0               | 0          | 1               | 0               | 0          | 0          | 1               | 0          | 0          | 1          | 1               | 0          | 0          | 0          | 0          |
| <i>Bicyclus aurivilli</i>                           | 0          | 0          | 0               | 0          | 0               | 1               | 1          | 1          | 0               | 0          | 0          | 0          | 0               | 0          | 1          | 0          | 0          |
| <i>Bicyclus mutata</i>                              | 0          | 0          | 0               | 0          | 0               | 1               | 0          | 1          | 0               | 0          | 0          | 0          | 0               | 0          | 1          | 0          | 0          |
| <i>Bicyclus ena</i>                                 | 0          | 0          | 0               | 0          | 0               | 0               | 0          | 0          | 0               | 0          | 0          | 1          | 0               | 0          | 0          | 0          | 0          |
| <i>Bicyclus procurus</i>                            | 0          | 0          | 0               | 0          | 0               | 0               | 0          | 0          | 0               | 0          | 0          | 0          | 1               | 1          | 0          | 0          | 0          |
| <i>Bicyclus neustetteri</i>                         | 0          | 0          | 0               | 0          | 0               | 0               | 0          | 0          | 0               | 0          | 0          | 0          | 0               | 0          | 1          | 0          | 0          |
| <i>Bicyclus pavonis</i>                             | 0          | 0          | 0               | 0          | 0               | 0               | 0          | 0          | 0               | 0          | 0          | 0          | 0               | 0          | 0          | 1          | 1          |
| <i>Henotesia peitho</i>                             | 1          | 0          | 1               | 0          | 1               | 0               | 0          | 0          | 0               | 0          | 0          | 1          | 1               | 0          | 0          | 0          | 0          |
| <i>Henotesia perspicua</i>                          | 0          | 0          | 0               | 0          | 1               | 0               | 0          | 0          | 0               | 0          | 0          | 0          | 0               | 0          | 0          | 0          | 1          |
| <i>Henotesia phaea</i>                              | 0          | 0          | 0               | 0          | 0               | 0               | 0          | 0          | 1               | 0          | 1          | 1          | 0               | 1          | 0          | 1          | 1          |

| <b>Butterfly family,<br/>sub-family and species</b> | <b>Kal</b> | <b>Itw</b> | <b>Bu<br/>g</b> | <b>Kis</b> | <b>Bu<br/>d</b> | <b>Rw<br/>e</b> | <b>Ech</b> | <b>Maf</b> | <b>Ka<br/>g</b> | <b>Mat</b> | <b>Kit</b> | <b>Kas</b> | <b>Se<br/>m</b> | <b>Kib</b> | <b>Bwi</b> | <b>Kei</b> | <b>Era</b> |
|-----------------------------------------------------|------------|------------|-----------------|------------|-----------------|-----------------|------------|------------|-----------------|------------|------------|------------|-----------------|------------|------------|------------|------------|
| <i>Ypthima albida</i>                               | 1          | 1          | 1               | 0          | 1               | 1               | 1          | 1          | 1               | 1          | 1          | 1          | 1               | 1          | 1          | 0          | 0          |
| <i>Ypthima pupillaris</i>                           | 1          | 0          | 0               | 0          | 0               | 0               | 0          | 0          | 0               | 0          | 0          | 0          | 0               | 0          | 0          | 0          | 0          |
| <i>Ypthima sp.</i>                                  | 0          | 0          | 0               | 0          | 1               | 0               | 0          | 0          | 1               | 1          | 0          | 0          | 1               | 0          | 0          | 1          | 1          |
| <i>Ypthima doleta</i>                               | 0          | 0          | 0               | 0          | 0               | 0               | 1          | 0          | 1               | 0          | 0          | 0          | 0               | 0          | 0          | 0          | 0          |
| <i>Ypthima asterope</i>                             | 0          | 0          | 0               | 0          | 0               | 0               | 0          | 0          | 0               | 0          | 0          | 0          | 0               | 0          | 0          | 1          | 0          |
| <i>Ypthimomorpha itonia</i>                         | 1          | 0          | 1               | 0          | 1               | 0               | 0          | 0          | 1               | 0          | 0          | 1          | 0               | 1          | 0          | 1          | 0          |
| <i>Neocoenyra gregorii</i>                          | 0          | 0          | 0               | 0          | 0               | 0               | 0          | 1          | 0               | 0          | 0          | 0          | 0               | 0          | 0          | 0          | 0          |
| <i>Coenyropsis carcassoni</i>                       | 0          | 0          | 0               | 0          | 0               | 0               | 0          | 0          | 0               | 0          | 0          | 1          | 0               | 0          | 0          | 0          | 0          |
| <b>Caraxinae</b>                                    |            |            |                 |            |                 |                 |            |            |                 |            |            |            |                 |            |            |            |            |
| <i>Charaxes ameliae</i>                             | 1          | 1          | 1               | 1          | 1               | 0               | 0          | 0          | 0               | 0          | 0          | 0          | 1               | 1          | 0          | 0          | 0          |
| <i>Charaxes anticlea</i>                            | 1          | 0          | 1               | 0          | 0               | 0               | 0          | 0          | 1               | 1          | 1          | 0          | 0               | 1          | 1          | 0          | 0          |
| <i>Charaxes bipunctatus</i>                         | 1          | 1          | 1               | 0          | 1               | 0               | 0          | 0          | 0               | 0          | 0          | 0          | 1               | 1          | 0          | 0          | 0          |
| <i>Charaxes brutus</i>                              | 1          | 0          | 1               | 0          | 1               | 0               | 0          | 0          | 1               | 1          | 0          | 1          | 1               | 1          | 1          | 0          | 0          |
| <i>Charaxes candiope</i>                            | 1          | 1          | 1               | 0          | 1               | 1               | 0          | 0          | 0               | 0          | 0          | 1          | 1               | 1          | 1          | 0          | 0          |
| <i>Charaxes catachrous</i>                          | 1          | 0          | 1               | 1          | 1               | 0               | 0          | 0          | 0               | 1          | 1          | 0          | 1               | 1          | 0          | 0          | 0          |
| <i>Charaxes cedreatis</i>                           | 1          | 0          | 1               | 0          | 1               | 0               | 0          | 0          | 0               | 0          | 0          | 0          | 1               | 1          | 0          | 0          | 0          |
| <i>Charaxes etheocles</i>                           | 1          | 1          | 1               | 0          | 0               | 0               | 0          | 0          | 1               | 0          | 0          | 1          | 1               | 1          | 1          | 0          | 0          |
| <i>Charaxes eudoxus</i>                             | 1          | 0          | 0               | 0          | 1               | 0               | 0          | 0          | 0               | 0          | 1          | 1          | 0               | 1          | 1          | 0          | 0          |
| <i>Charaxes eupale</i>                              | 1          | 0          | 1               | 0          | 1               | 0               | 0          | 0          | 0               | 1          | 1          | 1          | 1               | 1          | 0          | 0          | 0          |
| <i>Charaxes fulvescens</i>                          | 1          | 0          | 1               | 1          | 1               | 0               | 0          | 0          | 1               | 1          | 1          | 1          | 1               | 1          | 1          | 0          | 0          |
| <i>Charaxes numenes</i>                             | 1          | 1          | 1               | 0          | 1               | 0               | 0          | 0          | 1               | 1          | 1          | 1          | 1               | 1          | 1          | 0          | 0          |
| <i>Charaxes pleione</i>                             | 1          | 1          | 0               | 0          | 1               | 0               | 0          | 0          | 1               | 0          | 0          | 1          | 1               | 1          | 0          | 0          | 0          |
| <i>Charaxes pollux</i>                              | 1          | 0          | 1               | 1          | 0               | 0               | 0          | 0          | 1               | 1          | 1          | 1          | 1               | 1          | 0          | 0          | 0          |
| <i>Charaxes protoclea</i>                           | 1          | 1          | 0               | 0          | 0               | 0               | 0          | 0          | 1               | 0          | 1          | 0          | 1               | 1          | 0          | 0          | 0          |
| <i>Charaxes smaragdilis</i>                         | 1          | 0          | 1               | 0          | 1               | 0               | 0          | 0          | 0               | 0          | 0          | 1          | 0               | 1          | 1          | 0          | 0          |

| <b>Butterfly family,<br/>sub-family and species</b> | <b>Kal</b> | <b>Itw</b> | <b>Bu<br/>g</b> | <b>Kis</b> | <b>Bu<br/>d</b> | <b>Rw<br/>e</b> | <b>Ech</b> | <b>Maf</b> | <b>Ka<br/>g</b> | <b>Mat</b> | <b>Kit</b> | <b>Kas</b> | <b>Se<br/>m</b> | <b>Kib</b> | <b>Bwi</b> | <b>Kei</b> | <b>Era</b> |
|-----------------------------------------------------|------------|------------|-----------------|------------|-----------------|-----------------|------------|------------|-----------------|------------|------------|------------|-----------------|------------|------------|------------|------------|
| <i>Charaxes subornatus</i>                          | 1          | 0          | 1               | 0          | 1               | 0               | 0          | 0          | 0               | 0          | 0          | 1          | 1               | 1          | 0          | 0          | 0          |
| <i>Charaxes tiridates</i>                           | 1          | 1          | 1               | 0          | 1               | 1               | 0          | 0          | 1               | 1          | 1          | 1          | 1               | 1          | 1          |            | 1          |
| <i>Charaxes varanes</i>                             | 1          | 0          | 0               | 1          | 1               | 0               | 0          | 0          | 0               | 1          | 1          | 0          | 1               | 0          | 1          | 1          | 1          |
| <i>Charaxes virilis</i>                             | 1          | 0          | 1               | 0          | 1               | 0               | 0          | 0          | 0               | 0          | 0          | 0          | 1               | 0          | 0          | 0          | 0          |
| <i>Charaxes kahledeni</i>                           | 0          | 1          | 1               | 0          | 0               | 0               | 0          | 0          | 0               | 0          | 0          | 0          | 1               | 1          | 0          | 0          | 0          |
| <i>Charaxes laodice</i>                             | 0          | 1          | 0               | 0          | 0               | 0               | 0          | 0          | 0               | 0          | 0          | 0          | 1               | 0          | 0          | 1          | 0          |
| <i>Charaxes zoolina</i>                             | 0          | 1          | 0               | 0          | 1               | 1               | 0          | 0          | 0               | 0          | 0          | 0          | 0               | 0          | 1          | 0          | 0          |
| <i>Charaxes baumannii</i>                           | 0          | 0          | 1               | 0          |                 | 0               | 0          | 0          | 0               | 0          | 0          | 0          | 0               | 0          | 0          | 0          | 0          |
| <i>Charaxes castor</i>                              | 0          | 0          | 1               | 0          | 1               | 0               | 0          | 0          | 0               | 0          | 0          | 1          | 1               | 1          | 0          | 0          | 0          |
| <i>Charaxes cynthia</i>                             | 0          | 0          | 1               | 0          | 1               | 0               | 0          | 0          | 1               | 1          | 1          | 0          | 1               | 1          | 0          | 0          | 0          |
| <i>Charaxes etesipe</i>                             | 0          | 1          | 1               | 0          | 1               | 0               | 0          | 0          | 0               | 0          | 1          | 1          | 1               | 0          | 0          | 0          | 0          |
| <i>Charaxes paphianus</i>                           | 0          | 0          | 1               | 0          | 1               | 0               | 0          | 0          | 0               | 0          | 0          | 0          | 1               | 1          | 0          | 0          | 0          |
| <i>Charaxes pythodoris</i>                          | 0          | 0          | 1               | 1          | 0               | 0               | 0          | 0          | 0               | 0          | 0          | 0          | 0               | 1          | 0          | 0          | 0          |
| <i>Charaxes zelica</i>                              | 0          | 0          | 1               | 0          | 1               | 0               | 0          | 0          | 0               | 0          | 0          | 0          | 0               | 1          | 0          | 0          | 0          |
| <i>Charaxes zingha</i>                              | 0          | 0          | 1               | 0          | 1               | 0               | 0          | 0          | 1               | 0          | 1          | 0          | 1               | 0          | 0          | 0          | 0          |
| <i>Charaxes achaemenes</i>                          | 0          | 0          | 0               | 0          | 1               | 0               | 0          | 0          | 0               | 0          | 1          | 0          | 0               | 0          | 0          | 1          | 1          |
| <i>Charaxes epijasius</i>                           | 0          | 0          | 0               | 0          | 1               | 0               | 0          | 0          | 0               | 0          | 0          | 0          | 0               | 0          | 0          | 1          | 1          |
| <i>Charaxes incretius</i>                           | 0          | 0          | 0               | 0          | 1               | 0               | 0          | 0          | 0               | 0          | 0          | 0          | 0               | 0          | 0          | 0          | 0          |
| <i>Charaxes picta</i>                               | 0          | 0          | 0               | 0          | 1               | 0               | 0          | 0          | 0               | 0          | 0          | 1          | 1               | 0          | 0          | 1          | 1          |
| <i>Charaxes ansorgei</i>                            | 0          | 0          | 0               | 0          | 0               | 1               | 0          | 0          | 0               | 0          | 0          | 0          | 0               | 0          | 1          | 0          | 0          |
| <i>Charaxes acuminatus</i>                          | 0          | 0          | 0               | 0          | 0               | 0               | 1          | 1          | 0               | 0          | 0          | 0          | 0               | 0          | 0          | 0          | 0          |
| <i>Charaxes alticola</i>                            | 0          | 0          | 0               | 0          | 0               | 0               | 1          | 0          | 0               | 0          | 0          | 0          | 0               | 0          | 0          | 0          | 0          |
| <i>Charaxes xiphares</i>                            | 0          | 0          | 0               | 0          | 0               | 0               | 0          | 1          | 0               | 0          | 0          | 0          | 0               | 0          | 0          | 0          | 0          |
| <i>Charaxes imperialis</i>                          | 0          | 0          | 0               | 0          | 0               | 0               | 0          | 0          | 1               | 0          | 0          | 0          | 1               | 0          | 0          | 0          | 0          |
| <i>Charaxes lucreatus</i>                           | 0          | 0          | 0               | 0          | 0               | 0               | 0          | 0          | 0               | 0          | 0          | 1          | 1               | 0          | 0          | 0          | 0          |

| <b>Butterfly family,<br/>sub-family and species</b> | <b>Kal</b> | <b>Itw</b> | <b>Bu<br/>g</b> | <b>Kis</b> | <b>Bu<br/>d</b> | <b>Rw<br/>e</b> | <b>Ech</b> | <b>Maf</b> | <b>Ka<br/>g</b> | <b>Mat</b> | <b>Kit</b> | <b>Kas</b> | <b>Se<br/>m</b> | <b>Kib</b> | <b>Bwi</b> | <b>Kei</b> | <b>Era</b> |
|-----------------------------------------------------|------------|------------|-----------------|------------|-----------------|-----------------|------------|------------|-----------------|------------|------------|------------|-----------------|------------|------------|------------|------------|
| <i>Charaxes porthos</i>                             | 0          | 0          | 0               | 0          | 0               | 0               | 0          | 0          | 0               | 0          | 0          | 0          | 0               | 1          | 0          | 0          | 0          |
| <i>Charaxes dilutes</i>                             | 0          | 0          | 0               | 0          | 0               | 0               | 0          | 0          | 0               | 0          | 0          | 0          | 0               | 0          | 1          | 0          | 0          |
| <i>Charaxes opinotus</i>                            | 0          | 0          | 0               | 0          | 0               | 0               | 0          | 0          | 0               | 0          | 0          | 0          | 0               | 0          | 1          | 0          | 0          |
| <i>Charaxes boutei</i>                              | 0          | 0          | 0               | 0          | 0               | 0               | 0          | 0          | 0               | 0          | 0          | 0          | 0               | 0          | 0          | 1          | 1          |
| <i>Charaxes kirki</i>                               | 0          | 0          | 0               | 0          | 0               | 0               | 0          | 0          | 0               | 0          | 0          | 0          | 0               | 0          | 0          | 1          | 0          |
| <i>Charaxes lactetinctus</i>                        | 0          | 0          | 0               | 0          | 0               | 0               | 0          | 0          | 0               | 0          | 0          | 0          | 0               | 0          | 0          | 1          | 1          |
| <i>Euxanthe eurimone</i>                            | 1          | 1          | 0               | 0          | 1               | 0               | 0          | 0          | 1               | 1          | 1          | 0          | 1               | 0          | 0          | 0          | 0          |
| <i>Euxanthe crossleyi</i>                           | 0          | 0          | 1               | 0          | 0               | 0               | 0          | 0          | 0               | 1          | 0          | 1          | 0               | 1          | 0          | 0          | 0          |
| <i>Palla ussheri</i>                                | 0          | 1          | 0               | 0          | 1               | 0               | 0          | 0          | 0               | 0          | 0          | 0          | 0               | 0          | 0          | 0          | 0          |
| <i>Palla violiniteus</i>                            | 0          | 0          | 0               | 0          | 0               | 0               | 0          | 0          | 0               | 0          | 0          | 0          | 1               | 0          | 0          | 0          | 0          |
| <b>Nymphalinae</b>                                  |            |            |                 |            |                 |                 |            |            |                 |            |            |            |                 |            |            |            |            |
| <i>Cymothoe hermina</i>                             | 1          | 1          | 1               | 0          | 1               | 0               | 0          | 0          | 0               | 0          | 0          | 1          | 1               | 1          | 0          | 0          | 0          |
| <i>Cymothoe caenis</i>                              | 0          | 1          | 1               | 0          | 1               | 0               | 0          | 0          | 1               | 0          | 0          | 1          | 1               | 0          | 0          | 0          | 0          |
| <i>Cymothoe hobarti</i>                             | 0          | 1          | 1               | 0          | 1               | 0               | 0          | 0          | 1               | 0          | 0          | 0          | 1               | 1          | 0          | 0          | 0          |
| <i>Cymothoe lurida</i>                              | 0          | 1          | 1               | 0          | 1               | 0               | 0          | 0          | 0               | 0          | 0          | 1          | 0               | 1          | 0          | 0          | 0          |
| <i>Cymothoe ochreata</i>                            | 0          | 0          | 1               | 0          | 1               | 0               | 0          | 0          | 0               | 0          | 0          | 0          | 0               | 0          | 0          | 0          | 0          |
| <i>Cymothoe jodutta</i>                             | 0          | 0          | 0               | 0          | 1               | 0               | 0          | 0          | 0               | 0          | 0          | 0          | 1               | 0          | 0          | 0          | 0          |
| <i>Cymothoe indamon</i>                             | 0          | 0          | 0               | 0          | 0               | 0               | 0          | 0          | 0               | 0          | 0          | 1          | 0               | 0          | 0          | 0          | 0          |
| <i>Cymothoe reginacelisabethae</i>                  | 0          | 0          | 0               | 0          | 0               | 0               | 0          | 0          | 0               | 0          | 0          | 1          | 1               | 0          | 0          | 0          | 0          |
| <i>Cymothoe occinata</i>                            | 0          | 0          | 0               | 0          | 0               | 0               | 0          | 0          | 0               | 0          | 0          | 0          | 1               | 0          | 0          | 0          | 0          |
| <i>Cymothoe cyclades</i>                            | 0          | 0          | 0               | 0          | 0               | 0               | 0          | 0          | 0               | 0          | 0          | 0          | 1               | 0          | 0          | 0          | 0          |
| <i>Cymothoe egesta</i>                              | 0          | 0          | 0               | 0          | 0               | 0               | 0          | 0          | 0               | 0          | 0          | 0          | 1               | 0          | 0          | 0          | 0          |
| <i>Cymothoe sangaris</i>                            | 0          | 0          | 0               | 0          | 0               | 0               | 0          | 0          | 0               | 0          | 0          | 0          | 1               | 0          | 0          | 0          | 0          |
| <i>Harma theobene</i>                               | 1          | 1          | 1               | 1          | 1               | 0               | 0          | 0          | 0               | 0          | 0          | 1          | 1               | 1          | 1          | 0          | 0          |
| <i>Pseudoneptis bugandensis</i>                     | 1          | 0          | 1               | 0          | 0               | 0               | 0          | 0          | 1               | 1          | 1          | 1          | 1               | 1          | 0          | 0          | 0          |

| <b>Butterfly family,<br/>sub-family and species</b> | <b>Kal</b> | <b>Itw</b> | <b>Bu<br/>g</b> | <b>Kis</b> | <b>Bu<br/>d</b> | <b>Rw<br/>e</b> | <b>Ech</b> | <b>Maf</b> | <b>Ka<br/>g</b> | <b>Mat</b> | <b>Kit</b> | <b>Kas</b> | <b>Se<br/>m</b> | <b>Kib</b> | <b>Bwi</b> | <b>Kei</b> | <b>Era</b> |
|-----------------------------------------------------|------------|------------|-----------------|------------|-----------------|-----------------|------------|------------|-----------------|------------|------------|------------|-----------------|------------|------------|------------|------------|
| <i>Bebearia sophus</i>                              | 1          | 0          | 1               | 0          | 1               | 0               | 0          | 0          | 0               | 0          | 0          | 0          | 0               | 0          | 1          | 0          | 0          |
| <i>Bebearia mardania</i>                            | 1          | 0          | 1               | 0          | 0               | 0               | 0          | 0          | 1               | 0          | 1          | 1          | 1               | 1          | 0          | 0          | 0          |
| <i>Bebearia brunhilda</i>                           | 0          | 0          | 1               | 0          | 1               | 0               | 0          | 0          | 1               | 0          | 0          | 0          | 1               | 0          | 1          | 0          | 0          |
| <i>Bebearia laetitiodes</i>                         | 0          | 0          | 1               | 0          | 1               | 0               | 0          | 0          | 1               | 0          | 0          | 0          | 0               | 0          | 0          | 0          | 0          |
| <i>Bebearia plistonax</i>                           | 0          | 0          | 1               | 0          | 0               | 0               | 0          | 0          | 0               | 0          | 0          | 0          | 1               | 0          | 0          | 0          | 0          |
| <i>Bebearia zonara</i>                              | 0          | 0          | 1               | 0          | 1               | 0               | 0          | 0          | 0               | 0          | 0          | 0          | 1               | 0          | 0          | 0          | 0          |
| <i>Bebearia absolom</i>                             | 0          | 0          | 0               | 0          | 1               | 0               | 0          | 0          | 1               | 0          | 0          | 1          | 1               | 0          | 0          | 0          | 0          |
| <i>Bebearia cocolia</i>                             | 0          | 0          | 0               | 0          | 1               | 0               | 0          | 0          | 1               | 1          | 1          | 1          | 1               | 1          | 0          | 0          | 0          |
| <i>Bebearia barca</i>                               | 0          | 0          | 0               | 0          | 0               | 0               | 0          | 0          | 0               | 0          | 0          | 0          | 1               | 0          | 0          | 0          | 0          |
| <i>Bebearia carshena</i>                            | 0          | 0          | 0               | 0          | 0               | 0               | 0          | 0          | 0               | 0          | 0          | 0          | 1               | 0          | 0          | 0          | 0          |
| <i>Bebearia partita</i>                             | 0          | 0          | 0               | 0          | 0               | 0               | 0          | 0          | 0               | 0          | 0          | 0          | 1               | 0          | 0          | 0          | 0          |
| <i>Bebearia tentyrus</i>                            | 0          | 0          | 0               | 0          | 0               | 0               | 0          | 0          | 0               | 0          | 0          | 0          | 1               | 0          | 0          | 0          | 0          |
| <i>Eupheadra christyi</i>                           | 1          | 0          | 0               | 0          | 0               | 0               | 0          | 0          | 0               | 0          | 0          | 1          | 0               | 1          | 1          | 0          | 0          |
| <i>Eupheadra eleus</i>                              | 1          | 0          | 1               | 0          | 1               | 0               | 0          | 0          | 1               | 0          | 0          | 1          | 1               | 1          | 0          | 0          | 0          |
| <i>Eupheadra ensemoides</i>                         | 1          | 0          | 1               | 0          | 1               | 0               | 0          | 0          | 0               | 0          | 0          | 1          | 0               | 1          | 0          | 0          | 0          |
| <i>Eupheadra medon</i>                              | 1          | 0          | 1               | 0          | 1               | 0               | 0          | 0          | 1               | 1          | 1          | 1          | 1               | 0          | 1          | 0          | 0          |
| <i>Eupheadra peculiaris</i>                         | 1          | 0          | 0               | 0          | 1               | 0               | 0          | 0          | 1               | 1          | 0          | 0          | 1               | 0          | 0          | 0          | 0          |
| <i>Eupheadra preussi</i>                            | 1          | 1          | 1               | 0          | 1               | 0               | 0          | 0          | 1               | 0          | 0          | 1          | 0               | 0          | 0          | 0          | 0          |
| <i>Eupheadra uganda</i>                             | 0          | 1          | 1               | 0          | 1               | 0               | 0          | 0          | 1               | 1          | 0          | 0          | 0               | 0          | 0          | 0          | 0          |
| <i>Eupheadra hollandi</i>                           | 0          | 0          | 1               | 0          | 1               | 0               | 0          | 0          | 1               | 0          | 0          | 1          | 1               | 0          | 0          | 0          | 0          |
| <i>Eupheadra edwardsi</i>                           | 0          | 0          | 1               | 0          | 1               | 0               | 0          | 0          | 1               | 0          | 0          | 1          | 1               | 1          | 0          | 0          | 0          |
| <i>Eupheadra harpalyce</i>                          | 0          | 0          | 1               | 0          | 0               | 0               | 0          | 0          | 0               | 0          | 0          | 1          | 1               | 1          | 1          | 0          | 0          |
| <i>Eupheadra rex</i>                                | 0          | 0          | 1               | 0          | 0               | 0               | 0          | 0          | 0               | 0          | 0          | 1          | 0               | 0          | 0          | 0          | 0          |
| <i>Eupheadra ruspina</i>                            | 0          | 0          | 1               | 0          | 1               | 0               | 0          | 0          | 0               | 0          | 0          | 0          | 0               | 0          | 0          | 0          | 0          |
| <i>Aterica galene</i>                               | 1          | 0          | 1               | 0          | 1               | 0               | 0          | 0          | 1               | 1          | 1          | 0          | 1               | 1          | 0          | 0          | 0          |





| <b>Butterfly family,<br/>sub-family and species</b> | <b>Kal</b> | <b>Itw</b> | <b>Bu<br/>g</b> | <b>Kis</b> | <b>Bu<br/>d</b> | <b>Rw<br/>e</b> | <b>Ech</b> | <b>Maf</b> | <b>Ka<br/>g</b> | <b>Mat</b> | <b>Kit</b> | <b>Kas</b> | <b>Se<br/>m</b> | <b>Kib</b> | <b>Bwi</b> | <b>Kei</b> | <b>Era</b> |
|-----------------------------------------------------|------------|------------|-----------------|------------|-----------------|-----------------|------------|------------|-----------------|------------|------------|------------|-----------------|------------|------------|------------|------------|
| <i>Neptis exalencia</i>                             | 0          | 0          | 0               | 0          | 0               | 0               | 0          | 1          | 0               | 0          | 0          | 1          | 0               | 1          | 0          | 0          | 0          |
| <i>Neptis laeta</i>                                 | 0          | 0          | 0               | 0          | 0               | 0               | 0          | 0          | 1               | 0          | 0          | 1          | 0               | 1          | 0          | 0          | 0          |
| <i>Neptis kiraikoffi</i>                            | 0          | 0          | 0               | 0          | 0               | 0               | 0          | 0          | 0               | 0          | 1          | 1          | 0               | 0          | 0          | 1          | 0          |
| <i>Neptis seeldryersi</i>                           | 0          | 0          | 0               | 0          | 0               | 0               | 0          | 0          | 0               | 0          | 1          | 0          | 1               | 0          | 0          | 0          | 0          |
| <i>Neptis penningtoni</i>                           | 0          | 0          | 0               | 0          | 0               | 0               | 0          | 0          | 0               | 0          | 0          | 1          | 0               | 0          | 1          | 0          | 0          |
| <i>Neptis continuata</i>                            | 0          | 0          | 0               | 0          | 0               | 0               | 0          | 0          | 0               | 0          | 0          | 0          | 1               | 0          | 0          | 0          | 0          |
| <i>Neptis lermanni</i>                              | 0          | 0          | 0               | 0          | 0               | 0               | 0          | 0          | 0               | 0          | 0          | 0          | 1               | 0          | 0          | 0          | 0          |
| <i>Neptis poultoni</i>                              | 0          | 0          | 0               | 0          | 0               | 0               | 0          | 0          | 0               | 0          | 0          | 0          | 0               | 1          | 0          | 0          | 0          |
| <i>Neptis woodwardi</i>                             | 0          | 0          | 0               | 0          | 0               | 0               | 0          | 0          | 0               | 0          | 0          | 0          | 0               | 0          | 1          | 0          | 0          |
| <i>Cyretis camillus</i>                             | 1          | 1          | 1               | 0          | 0               | 0               | 0          | 0          | 1               | 1          | 1          | 1          | 1               | 1          | 1          | 0          | 0          |
| <i>Sallya boiduvali</i>                             | 1          | 1          | 1               | 0          | 1               | 0               | 0          | 0          | 0               | 0          | 1          | 1          | 0               | 1          | 1          | 0          | 0          |
| <i>Sallya garega</i>                                | 1          | 0          | 1               | 0          | 0               | 1               | 0          | 0          | 1               | 1          | 1          | 1          | 0               | 1          | 1          | 1          | 0          |
| <i>Sallya occidentalia</i>                          | 0          | 1          | 1               | 1          | 1               | 0               | 0          | 0          | 1               | 1          | 1          | 1          | 1               | 1          | 0          | 0          | 0          |
| <i>Sallya umbrina</i>                               | 0          | 0          | 0               | 0          | 0               | 0               | 0          | 0          | 0               | 0          | 1          | 1          | 0               | 1          | 0          | 0          | 0          |
| <i>Byblia anvatarata</i>                            | 1          | 0          | 0               | 1          | 1               | 0               | 0          | 0          | 1               | 1          | 1          | 0          | 1               | 1          | 0          | 1          | 1          |
| <i>Byblia ilithya</i>                               | 0          | 0          | 0               | 0          | 0               | 0               | 0          | 0          | 0               | 0          | 0          | 0          | 1               | 0          | 0          | 0          | 1          |
| <i>Mesoxantha ethosea</i>                           | 1          | 0          | 1               | 0          | 0               | 0               | 0          | 0          | 0               | 0          | 0          | 0          | 1               | 1          | 0          | 0          | 0          |
| <i>Ariadne enotrea</i>                              | 1          | 1          | 1               | 1          | 1               | 0               | 0          | 0          | 1               | 1          | 1          | 1          | 1               | 1          | 0          | 0          | 0          |
| <i>Ariadne pagenstecheri</i>                        | 1          | 1          | 0               | 0          | 0               | 1               | 0          | 0          | 1               | 1          |            | 1          | 1               | 1          | 0          | 0          | 0          |
| <i>Neptidopsis ophione</i>                          | 1          | 1          | 1               | 1          | 1               | 1               | 0          | 0          | 1               | 1          | 1          | 1          | 1               | 1          | 1          | 0          | 0          |
| <i>Eurytela dryope</i>                              | 1          | 0          | 1               | 1          | 1               | 1               | 0          | 0          | 1               | 1          | 1          | 0          | 1               | 1          | 0          | 1          | 0          |
| <i>Eurytela hairbas</i>                             | 1          | 1          | 1               | 1          | 0               | 1               | 0          | 0          | 1               | 1          | 1          | 1          | 1               | 1          | 1          | 0          | 0          |
| <i>Kallima rumia</i>                                | 1          | 0          | 1               | 0          | 0               | 0               | 0          | 0          | 0               | 0          | 0          | 1          | 1               | 1          | 1          | 0          | 0          |
| <i>Kallima ansorgei</i>                             | 0          | 0          | 1               | 0          | 0               | 0               | 0          | 0          | 0               | 0          | 0          | 0          | 1               | 1          | 0          | 0          | 0          |
| <i>Hypolimnas anthedon</i>                          | 1          | 0          | 1               | 0          | 1               | 0               | 0          | 0          | 1               | 0          | 1          | 0          | 1               | 1          | 0          | 0          | 0          |

| <b>Butterfly family,<br/>sub-family and species</b> | <b>Kal</b> | <b>Itw</b> | <b>Bu<br/>g</b> | <b>Kis</b> | <b>Bu<br/>d</b> | <b>Rw<br/>e</b> | <b>Ech</b> | <b>Maf</b> | <b>Ka<br/>g</b> | <b>Mat</b> | <b>Kit</b> | <b>Kas</b> | <b>Se<br/>m</b> | <b>Kib</b> | <b>Bwi</b> | <b>Kei</b> | <b>Era</b> |
|-----------------------------------------------------|------------|------------|-----------------|------------|-----------------|-----------------|------------|------------|-----------------|------------|------------|------------|-----------------|------------|------------|------------|------------|
| <i>Hypolimnas salmacidis</i>                        | 1          | 1          | 1               | 0          | 1               | 0               | 0          | 0          | 1               | 0          | 0          | 1          | 1               | 1          | 1          | 0          | 0          |
| <i>Hypolimnas bartheloti</i>                        | 0          | 0          | 1               | 0          | 0               | 0               | 0          | 0          | 0               | 0          | 0          | 1          | 0               | 0          | 0          | 0          | 0          |
| <i>Hypolimnas deceptor</i>                          | 0          | 0          | 1               | 0          | 0               | 0               | 0          | 0          | 0               | 0          | 0          | 0          | 0               | 0          | 0          | 0          | 0          |
| <i>Hypolimnas dinarcha</i>                          | 0          | 0          | 1               | 0          | 0               | 0               | 0          | 0          | 1               | 0          | 0          | 1          | 0               | 1          | 1          | 0          | 0          |
| <i>Hypolimnas dubius</i>                            | 0          | 0          | 0               | 0          | 1               | 0               | 0          | 0          | 0               | 0          | 0          | 0          | 0               | 0          | 0          | 0          | 0          |
| <i>Hypolimnas monteironis</i>                       | 0          | 0          | 0               | 0          | 0               | 0               | 0          | 0          | 0               | 0          | 0          | 0          | 1               | 0          | 0          | 0          | 0          |
| <i>Hypolimnas missipus</i>                          | 0          | 0          | 0               | 0          | 0               | 0               | 0          | 0          | 0               | 0          | 0          | 0          | 0               | 0          | 1          | 1          | 1          |
| <i>Salamis parhassus</i>                            | 1          | 1          | 1               | 0          | 1               | 0               | 0          | 0          | 1               | 1          | 1          | 1          | 1               | 0          | 1          | 0          | 0          |
| <i>Salamis cacta</i>                                | 0          | 0          | 1               | 0          | 0               | 0               | 0          | 0          | 0               | 0          | 0          | 0          | 1               | 1          | 0          | 0          | 0          |
| <i>Salamis temora</i>                               | 0          | 0          | 1               | 0          | 1               | 0               | 0          | 0          | 0               | 0          | 0          | 1          | 1               | 1          | 1          | 0          | 0          |
| <i>Salamis anacardii</i>                            | 0          | 0          | 0               | 0          | 1               | 0               | 0          | 0          | 0               | 0          | 0          | 0          | 0               | 0          | 0          | 0          | 0          |
| <i>Junonia sophia</i>                               | 1          | 1          | 0               | 0          | 1               | 0               | 0          | 0          | 0               | 0          | 0          | 1          | 1               | 1          | 1          | 0          | 0          |
| <i>Junonia stygia</i>                               | 1          | 1          | 1               | 0          | 1               | 0               | 0          | 0          | 1               | 1          | 0          | 1          | 1               | 1          | 1          | 0          | 0          |
| <i>Junonia terea</i>                                | 1          | 1          | 1               | 0          | 1               | 0               | 0          | 0          | 1               | 1          | 0          | 1          | 1               | 1          | 1          | 1          | 1          |
| <i>Junonia westermanni</i>                          | 0          | 1          | 1               | 0          | 1               | 0               | 0          | 0          | 1               | 1          | 1          | 0          | 1               | 1          | 1          | 0          | 0          |
| <i>Junonia chorimene</i>                            | 0          | 0          | 1               | 0          | 1               | 0               | 0          | 0          | 0               | 0          | 0          | 1          | 1               | 1          | 1          | 1          | 1          |
| <i>Junonia oenone</i>                               | 0          | 0          | 1               | 0          | 0               | 0               | 0          | 0          | 1               | 1          | 1          | 0          | 1               | 0          | 0          | 1          | 1          |
| <i>Junonia heirta</i>                               | 0          | 0          | 0               | 0          | 0               | 0               | 0          | 0          | 0               | 0          | 0          | 0          | 0               | 0          | 0          | 1          | 0          |
| <i>Junonia orithya</i>                              | 0          | 0          | 0               | 0          | 0               | 0               | 0          | 0          | 0               | 0          | 0          | 0          | 0               | 0          | 0          | 0          | 1          |
| <i>Precis ceryne</i>                                | 1          | 0          | 0               | 0          | 1               | 0               | 0          | 0          | 0               | 0          | 0          | 0          | 0               | 0          | 0          | 1          | 0          |
| <i>Precis ranana</i>                                | 1          | 0          | 0               | 0          | 0               | 0               | 0          | 0          | 0               | 0          | 0          | 0          | 0               | 1          | 0          | 0          | 0          |
| <i>Precis tugela</i>                                | 1          | 1          | 0               | 0          | 1               | 1               | 0          | 1          | 1               | 0          | 0          | 1          | 1               | 1          | 1          | 0          | 0          |
| <i>Precis sinuata</i>                               | 0          | 1          | 1               | 0          | 1               | 0               | 0          | 0          | 0               | 0          | 0          | 0          | 0               | 1          | 1          | 0          | 0          |
| <i>Precis pelarga</i>                               | 0          | 0          | 1               | 0          | 1               | 0               | 0          | 0          | 0               | 0          | 0          | 1          | 1               | 0          | 0          | 0          | 1          |
| <i>Precis antelope</i>                              | 0          | 0          | 0               | 0          | 1               | 0               | 0          | 0          | 0               | 0          | 0          | 0          | 1               | 0          | 0          | 1          | 0          |





| <b>Butterfly family,<br/>sub-family and species</b> | <b>Kal</b> | <b>Itw</b> | <b>Bu<br/>g</b> | <b>Kis</b> | <b>Bu<br/>d</b> | <b>Rw<br/>e</b> | <b>Ech</b> | <b>Maf</b> | <b>Ka<br/>g</b> | <b>Mat</b> | <b>Kit</b> | <b>Kas</b> | <b>Se<br/>m</b> | <b>Kib</b> | <b>Bwi</b> | <b>Kei</b> | <b>Era</b> |
|-----------------------------------------------------|------------|------------|-----------------|------------|-----------------|-----------------|------------|------------|-----------------|------------|------------|------------|-----------------|------------|------------|------------|------------|
| <i>Acraea perenna</i>                               | 1          | 0          | 1               | 0          | 1               | 0               | 0          | 0          | 0               | 0          | 0          | 1          | 0               | 0          | 1          | 1          | 0          |
| <i>Acraea pharsalus</i>                             | 1          | 1          | 1               | 0          | 0               | 0               | 0          | 0          | 1               | 1          | 0          | 0          | 1               | 1          | 0          | 0          | 0          |
| <i>Acraea quirinalis</i>                            | 1          | 1          | 1               | 0          | 1               | 0               | 0          | 0          | 1               | 1          | 0          | 1          | 0               | 1          | 0          | 0          | 0          |
| <i>Acraea semivitrea</i>                            | 1          | 0          | 1               | 0          | 1               | 0               | 0          | 0          | 0               | 0          | 0          | 0          | 0               | 0          | 0          | 0          | 0          |
| <i>Acraea servona</i>                               | 1          | 1          | 1               | 0          | 0               | 0               | 0          | 0          | 1               | 1          | 1          | 1          | 1               | 0          | 0          | 0          | 0          |
| <i>Acraea sotikensis</i>                            | 1          | 0          | 0               | 0          | 0               | 1               | 0          | 0          | 1               | 0          | 1          | 1          | 1               | 1          | 1          | 1          | 0          |
| <i>Acraea uvui</i>                                  | 1          | 1          | 1               | 0          | 0               | 1               | 1          | 1          | 1               | 0          | 0          | 0          | 0               | 1          | 1          | 1          | 0          |
| <i>Acraea viviana</i>                               | 1          | 1          | 1               | 0          | 1               | 1               | 0          | 0          | 0               | 0          | 0          | 0          | 1               | 0          | 0          | 0          | 0          |
| <i>Acraea cabira</i>                                | 0          | 1          | 0               | 0          | 0               | 1               | 0          | 0          | 0               | 0          | 0          | 0          | 0               | 0          | 0          | 0          | 0          |
| <i>Acraea abdera</i>                                | 0          | 0          | 1               | 0          | 0               | 0               | 0          | 0          | 0               | 0          | 0          | 0          | 0               | 0          | 0          | 1          | 0          |
| <i>Acraea althoffi</i>                              | 0          | 0          | 1               | 0          | 1               | 0               | 0          | 0          | 0               | 0          | 0          | 1          | 0               | 0          | 0          | 0          | 0          |
| <i>Acraea cepheus</i>                               | 0          | 0          | 1               | 0          | 0               | 0               | 0          | 0          | 0               | 0          | 1          | 0          | 0               | 0          | 1          | 1          | 1          |
| <i>Acraea encedon</i>                               | 0          | 0          | 1               | 0          | 0               | 1               | 0          | 0          | 1               | 0          | 0          | 0          | 1               | 0          | 0          | 1          | 0          |
| <i>Acraea esebria</i>                               | 0          | 0          | 1               | 0          | 1               | 0               | 0          | 0          | 0               | 0          | 0          | 0          | 0               | 0          | 0          | 0          | 0          |
| <i>Acraea macarista</i>                             | 0          | 0          | 1               | 0          | 1               | 0               | 0          | 0          | 0               | 0          | 1          | 0          | 0               | 0          | 0          | 0          | 0          |
| <i>Acraea orinata</i>                               | 0          | 0          | 1               | 0          | 0               | 0               | 0          | 0          | 0               | 0          | 1          | 1          | 0               | 0          | 0          | 0          | 0          |
| <i>Acraea quirina</i>                               | 0          | 0          | 1               | 0          | 1               | 0               | 0          | 0          | 0               | 0          | 1          | 0          | 0               | 0          | 0          | 0          | 0          |
| <i>Acraea tellus</i>                                | 0          | 0          | 1               | 0          | 0               | 0               | 0          | 0          | 0               | 0          | 0          | 0          | 0               | 0          | 0          | 0          | 0          |
| <i>Acraea zetes</i>                                 | 0          | 0          | 1               | 0          | 0               | 0               | 0          | 0          | 0               | 0          | 0          | 0          | 1               | 0          | 1          | 0          | 1          |
| <i>Acraea egina</i>                                 | 0          | 0          | 0               | 0          | 1               | 0               | 0          | 0          | 0               | 0          | 0          | 0          | 0               | 0          | 0          | 0          | 0          |
| <i>Acraea pseudegina</i>                            | 0          | 0          | 0               | 0          | 1               | 0               | 0          | 0          | 0               | 0          | 0          | 0          | 0               | 0          | 0          | 1          | 1          |
| <i>Acraea pseuderyta</i>                            | 0          | 0          | 0               | 0          | 1               | 0               | 0          | 0          | 0               | 0          | 0          | 1          | 0               | 0          | 0          | 0          | 0          |
| <i>Acraea quadricolor</i>                           | 0          | 0          | 0               | 0          | 1               | 1               | 1          | 1          | 0               | 0          | 0          | 0          | 0               | 0          | 1          | 0          | 0          |
| <i>Acraea amicitiae</i>                             | 0          | 0          | 0               | 0          | 0               | 1               | 1          | 1          | 0               | 0          | 0          | 0          | 0               | 0          | 1          | 0          | 0          |
| <i>Acraea ansorgei</i>                              | 0          | 0          | 0               | 0          | 0               | 1               | 1          | 0          | 0               | 0          | 0          | 0          | 0               | 0          | 1          | 0          | 0          |



| <b>Butterfly family,<br/>sub-family and species</b> | <b>Kal</b> | <b>Itw</b> | <b>Bu<br/>g</b> | <b>Kis</b> | <b>Bu<br/>d</b> | <b>Rw<br/>e</b> | <b>Ech</b> | <b>Maf</b> | <b>Ka<br/>g</b> | <b>Mat</b> | <b>Kit</b> | <b>Kas</b> | <b>Se<br/>m</b> | <b>Kib</b> | <b>Bwi</b> | <b>Kei</b> | <b>Era</b> |
|-----------------------------------------------------|------------|------------|-----------------|------------|-----------------|-----------------|------------|------------|-----------------|------------|------------|------------|-----------------|------------|------------|------------|------------|
| <b>Coeliadinae</b>                                  |            |            |                 |            |                 |                 |            |            |                 |            |            |            |                 |            |            |            |            |
| <i>Coeliades chalybe</i>                            | 1          | 0          | 1               | 0          | 0               | 0               | 0          | 0          | 0               | 0          | 1          | 0          | 1               | 0          | 0          | 0          | 1          |
| <i>Coeliades forestan</i>                           | 1          | 0          | 0               | 0          | 0               | 0               | 0          | 0          | 1               | 1          | 1          | 1          | 1               | 1          | 1          | 1          | 0          |
| <i>Coeliades hanno</i>                              | 0          | 0          | 1               | 0          | 0               | 0               | 0          | 0          | 0               | 0          | 1          | 0          | 0               | 0          | 0          | 0          | 0          |
| <i>Coeliades libeon</i>                             | 0          | 0          | 0               | 0          | 1               | 0               | 0          | 0          | 1               | 1          | 0          | 0          | 1               | 0          | 0          | 0          | 0          |
| <i>Coeliades auchises</i>                           | 0          | 0          | 0               | 0          | 0               | 0               | 0          | 0          | 0               | 0          | 0          | 0          | 0               | 0          | 0          | 1          | 0          |
| <b>Pyrginae</b>                                     |            |            |                 |            |                 |                 |            |            |                 |            |            |            |                 |            |            |            |            |
| <i>Celaenorrhinus galenus</i>                       | 0          | 0          | 1               | 0          | 1               | 1               | 0          | 0          | 1               | 0          | 0          | 0          | 1               | 1          | 0          | 0          | 0          |
| <i>Celaenorrhinus bettoni</i>                       | 0          | 0          | 1               | 0          | 0               | 1               | 0          | 0          | 0               | 0          | 0          | 0          | 0               | 0          | 0          | 0          | 0          |
| <i>Celaenorrhinus ovalis</i>                        | 0          | 0          | 0               | 0          | 1               | 0               | 0          | 0          | 0               | 0          | 0          | 0          | 0               | 0          | 0          | 0          | 0          |
| <i>Celaenorrhinus intermixtus</i>                   | 0          | 0          | 0               | 0          | 1               | 0               | 0          | 0          | 0               | 0          | 0          | 0          | 0               | 0          | 0          | 0          | 0          |
| <i>Celaenorrhinus proxima</i>                       | 1          | 0          | 0               | 0          | 1               | 0               | 0          | 0          | 0               | 0          | 0          | 0          | 0               | 1          | 0          | 0          | 0          |
| <i>Eagris leucetia</i>                              | 0          | 0          | 1               | 0          | 1               | 0               | 0          | 0          | 0               | 0          | 0          | 0          | 1               | 0          | 1          | 0          | 0          |
| <i>Eagris decestigma</i>                            | 1          | 0          | 0               | 0          | 0               | 0               | 0          | 0          | 0               | 0          | 0          | 0          | 1               | 0          | 0          | 0          | 0          |
| <i>Calleagris lecteus</i>                           | 0          | 0          | 1               | 0          | 1               | 0               | 0          | 0          | 0               | 0          | 0          | 0          | 1               | 0          | 0          | 0          | 0          |
| <i>Calleagris hollandi</i>                          | 1          | 1          | 1               | 0          | 0               | 0               | 0          | 0          | 0               | 0          | 0          | 0          | 1               | 0          | 0          | 0          | 0          |
| <i>Eretis lugens</i>                                | 0          | 0          | 1               | 0          | 0               | 0               | 0          | 0          | 0               | 1          | 0          | 1          | 0               | 1          | 1          | 0          | 0          |
| <i>Eretis vaga</i>                                  | 0          | 0          | 0               | 0          | 0               | 0               | 0          | 0          | 0               | 0          | 0          | 0          | 0               | 1          | 0          | 0          | 0          |
| <i>Eretis melania</i>                               | 1          | 0          | 0               | 0          | 0               | 0               | 1          | 0          | 0               | 0          | 0          | 0          | 0               | 0          | 1          | 0          | 0          |
| <i>Sarangesa bouveiri</i>                           | 0          | 1          | 0               | 0          | 1               | 0               |            | 0          | 1               | 0          | 0          | 0          | 0               | 0          | 0          | 0          | 0          |
| <i>Sarangesa lucidella</i>                          | 0          | 0          | 1               | 0          | 1               | 0               | 1          | 0          | 1               | 0          | 0          | 0          | 1               | 0          | 0          | 0          | 0          |
| <i>Sarangesa brigida</i>                            | 0          | 0          | 0               | 0          | 0               | 0               | 0          | 0          | 0               | 0          | 0          | 1          | 1               | 0          | 0          | 0          | 0          |
| <i>Sarangesa laelius</i>                            | 0          | 0          | 0               | 0          | 1               | 0               | 0          | 0          | 0               | 0          | 0          | 0          | 0               | 0          | 0          | 0          | 0          |
| <i>Sarangesa thecla</i>                             | 0          | 0          | 0               | 0          | 1               | 0               | 0          | 0          | 0               | 0          | 0          | 1          | 0               | 0          | 0          | 0          | 0          |
| <i>Sarangesa haplopa</i>                            | 0          | 0          | 0               | 0          | 0               | 1               | 1          | 0          | 0               | 0          | 0          | 0          | 0               | 0          | 1          | 0          | 0          |

| <b>Butterfly family,<br/>sub-family and species</b> | <b>Kal</b> | <b>Itw</b> | <b>Bu<br/>g</b> | <b>Kis</b> | <b>Bu<br/>d</b> | <b>Rw<br/>e</b> | <b>Ech</b> | <b>Maf</b> | <b>Ka<br/>g</b> | <b>Mat</b> | <b>Kit</b> | <b>Kas</b> | <b>Se<br/>m</b> | <b>Kib</b> | <b>Bwi</b> | <b>Kei</b> | <b>Era</b> |
|-----------------------------------------------------|------------|------------|-----------------|------------|-----------------|-----------------|------------|------------|-----------------|------------|------------|------------|-----------------|------------|------------|------------|------------|
| <i>Sarangesa astrigera</i>                          | 0          | 0          | 0               | 0          | 0               | 0               | 0          | 0          | 0               | 0          | 0          | 0          | 0               | 0          | 1          | 0          | 1          |
| <i>Sarangesa maculata</i>                           | 1          | 0          | 1               | 0          | 0               | 0               | 0          | 0          | 0               | 0          | 0          | 0          | 0               | 0          | 0          | 0          | 0          |
| <i>Spialia ploetzi</i>                              | 0          | 0          | 1               | 0          | 1               | 0               | 0          | 0          | 1               | 0          | 0          | 1          | 0               | 1          | 1          | 0          | 0          |
| <i>Spialia spio</i>                                 | 0          | 0          | 0               | 0          | 0               | 0               | 0          | 0          | 0               | 0          | 0          | 0          | 0               | 0          | 0          | 0          | 0          |
| <i>Spialia dromus</i>                               | 0          | 0          | 1               | 0          | 0               | 0               | 1          | 0          | 0               | 0          | 1          | 0          | 0               | 0          | 0          | 0          | 1          |
| <i>Tagiades flesus</i>                              | 0          | 0          | 1               | 0          | 1               | 0               | 0          | 0          | 0               | 0          | 0          | 0          | 0               | 0          | 1          | 1          | 0          |
| <i>Caprona adelica</i>                              | 0          | 0          | 0               | 0          | 0               | 0               | 0          | 0          | 0               | 0          | 0          | 0          | 0               | 0          | 0          | 1          | 0          |
| <i>Caprona pillaana</i>                             | 0          | 0          | 0               | 0          | 0               | 0               | 0          | 0          | 0               | 0          | 0          | 0          | 0               | 0          | 0          | 1          | 0          |
| <i>Abantis contigua</i>                             | 0          | 0          | 0               | 0          | 1               | 0               | 0          | 0          | 0               | 0          | 0          | 0          | 0               | 0          | 0          | 0          | 0          |
| <i>Epialia depaupereta</i>                          | 0          | 0          | 0               | 0          | 0               | 0               | 0          | 0          | 0               | 0          | 0          | 0          | 0               | 1          | 0          | 0          | 0          |
| <b>Hesperiinae</b>                                  |            |            |                 |            |                 |                 |            |            |                 |            |            |            |                 |            |            |            |            |
| <i>Ceratrachia brunnea</i>                          | 1          | 1          | 1               | 0          | 0               | 0               | 0          | 0          | 0               | 0          | 0          | 0          | 0               | 1          | 0          | 0          | 0          |
| <i>Ceratrachia flava</i>                            | 1          | 0          | 1               | 0          | 1               | 0               | 0          | 0          | 0               | 0          | 0          | 1          | 1               | 1          | 0          | 0          | 0          |
| <i>Ceratrachia hollandi</i>                         | 0          | 0          | 1               | 0          | 1               | 0               | 0          | 0          | 0               | 0          | 0          | 0          | 0               | 0          | 0          | 0          | 0          |
| <i>Ceratrachia mabirensis</i>                       | 0          | 0          | 0               | 0          | 0               | 0               | 0          | 0          | 0               | 0          | 0          | 0          | 0               | 0          | 0          | 0          | 0          |
| <i>Ceratrachia wollastoni</i>                       | 0          | 0          | 0               | 0          | 1               | 0               | 0          | 0          | 0               | 0          | 0          | 1          | 1               | 0          | 0          | 0          | 0          |
| <i>Ceratrachia aurea</i>                            | 1          | 0          | 0               | 0          | 0               | 0               | 0          | 0          | 0               | 0          | 0          | 1          | 0               | 0          | 0          | 0          | 0          |
| <i>Pardaleodes bule</i>                             | 1          | 1          | 1               | 0          | 0               | 0               | 0          | 0          | 0               | 0          | 0          | 0          | 0               | 0          | 0          | 0          | 1          |
| <i>Pardaleodes incerta</i>                          | 1          | 1          | 0               | 0          | 1               | 0               | 0          | 0          | 0               | 1          | 1          | 0          | 1               | 0          | 0          | 1          | 0          |
| <i>Pardaleodes sator</i>                            | 1          | 0          | 0               | 0          | 1               | 0               | 0          | 0          | 0               | 0          | 0          | 0          | 1               | 0          | 0          | 0          | 0          |
| <i>Pardaleodes tibullus</i>                         | 1          | 0          | 0               | 0          | 0               | 0               | 0          | 0          | 0               | 0          | 0          | 0          | 0               | 0          | 0          | 0          | 0          |
| <i>Pardaleodes briguttulus</i>                      | 1          | 1          | 1               | 0          | 0               | 0               | 0          | 0          | 1               | 0          | 0          | 1          | 0               | 1          | 0          | 0          | 0          |
| <i>Ankola fan</i>                                   | 1          | 1          | 1               | 0          | 1               | 0               | 0          | 0          | 0               | 0          | 0          | 1          | 0               | 0          | 0          | 0          | 0          |
| <i>Acleros meckenii</i>                             | 0          | 1          | 1               | 0          | 1               | 1               | 0          | 0          | 0               | 0          | 1          | 1          | 0               | 1          | 0          | 1          | 0          |
| <i>Acleros ploetzi</i>                              | 0          | 0          | 0               | 0          | 1               | 0               | 0          | 0          | 1               | 1          | 0          | 0          | 1               | 0          | 0          | 0          | 0          |





| <b>Butterfly family,<br/>sub-family and species</b> | <b>Kal</b> | <b>Itw</b> | <b>Bu<br/>g</b> | <b>Kis</b> | <b>Bu<br/>d</b> | <b>Rw<br/>e</b> | <b>Ech</b> | <b>Maf</b> | <b>Ka<br/>g</b> | <b>Mat</b> | <b>Kit</b> | <b>Kas</b> | <b>Se<br/>m</b> | <b>Kib</b> | <b>Bwi</b> | <b>Kei</b> | <b>Era</b> |
|-----------------------------------------------------|------------|------------|-----------------|------------|-----------------|-----------------|------------|------------|-----------------|------------|------------|------------|-----------------|------------|------------|------------|------------|
| <i>Zenonia zeno</i>                                 | 0          | 0          | 0               | 0          | 1               | 1               | 1          | 0          | 0               | 0          | 0          | 0          | 0               | 1          | 0          | 1          | 0          |
| <i>Zenonia crasta</i>                               | 0          | 0          | 0               | 0          | 0               | 1               | 1          | 0          | 0               | 0          | 0          | 0          | 0               | 0          | 0          | 0          | 0          |
| <i>Zenonia anox</i>                                 | 0          | 0          | 1               | 0          | 0               |                 | 1          | 0          | 0               | 0          | 0          | 0          | 0               | 0          | 0          | 0          | 0          |
| <i>Prosopalpus styła</i>                            | 0          | 0          | 1               | 0          | 1               | 0               | 0          | 0          | 0               | 0          | 0          | 0          | 0               | 1          | 0          | 0          | 0          |
| <i>Gorgyra aretina</i>                              | 0          | 0          | 0               | 0          | 0               | 0               | 0          | 0          | 0               | 0          | 0          | 0          | 0               | 0          | 0          | 0          | 0          |
| <i>Gorgyra kalinzu</i>                              | 0          | 0          | 1               | 0          | 0               | 0               | 0          | 0          | 0               | 0          | 1          | 0          | 0               | 0          | 0          | 0          | 0          |
| <i>Osmodes laronia</i>                              | 0          | 0          | 1               | 0          | 1               | 0               | 0          | 0          | 0               | 0          | 0          | 1          | 1               | 0          | 0          | 0          | 0          |
| <i>Osmodes omar</i>                                 | 0          | 0          | 1               | 0          | 0               | 0               | 0          | 0          | 0               | 0          | 0          | 0          | 0               | 0          | 0          | 0          | 0          |
| <i>Osmodes thora</i>                                | 0          | 0          | 1               | 0          | 1               | 0               | 0          | 0          | 0               | 0          | 0          | 1          | 1               | 0          | 0          | 0          | 0          |
| <i>Meza cybeutes</i>                                | 0          | 0          | 1               | 0          | 0               | 0               | 0          | 0          | 0               | 0          | 0          | 0          | 1               | 0          | 0          | 0          | 0          |
| <i>Gamia shelleyi</i>                               | 0          | 0          | 1               | 0          | 0               | 0               | 0          | 0          | 0               | 0          | 0          | 0          | 1               | 1          | 0          | 0          | 0          |
| <i>Monza alberti</i>                                | 0          | 0          | 1               | 0          | 0               | 0               | 0          | 0          | 0               | 0          | 0          | 0          | 0               | 0          | 0          | 0          | 0          |
| <i>Monza cretacea</i>                               | 0          | 0          | 0               | 0          | 1               | 0               | 0          | 0          | 0               | 0          | 0          | 0          | 0               | 0          | 0          | 1          | 0          |
| <i>Monza punctata</i>                               | 0          | 0          | 1               | 0          | 0               | 0               | 0          | 0          | 0               | 0          | 0          | 0          | 1               | 1          | 0          | 0          | 0          |
| <i>Fresna netopha</i>                               | 0          | 0          | 1               | 0          | 0               | 0               | 0          | 0          | 0               | 0          | 0          | 0          | 0               | 0          | 0          | 0          | 1          |
| <i>Pelopidas thrax</i>                              | 0          | 0          | 0               | 0          | 0               | 0               | 0          | 0          | 0               | 0          | 1          | 0          | 0               | 0          | 0          | 1          | 0          |
| <i>Lepella lepeletier</i>                           | 0          | 0          | 0               | 0          | 1               | 1               | 0          | 0          | 0               | 0          | 0          | 0          | 0               | 0          | 0          | 1          | 0          |
| <i>Teniorhinus watsoni</i>                          | 0          | 0          | 0               | 0          | 1               | 0               | 0          | 0          | 0               | 0          | 0          | 0          | 1               | 1          | 0          | 0          | 0          |
| <i>Teniorhinus ignata</i>                           | 0          | 0          | 0               | 0          | 0               | 0               | 0          | 0          | 1               | 0          | 0          | 0          | 1               | 0          | 0          | 0          | 0          |
| <i>Gegenes niso</i>                                 | 0          | 0          | 0               | 0          | 0               | 0               | 0          | 1          | 1               | 0          | 0          | 0          | 0               | 0          | 0          | 1          | 0          |
| <i>Gegenes hottentota</i>                           | 0          | 0          | 0               | 0          | 0               | 0               | 0          | 0          | 0               | 0          | 0          | 1          | 0               | 0          | 0          | 0          | 0          |
| <i>Kedestes brunneostriga</i>                       | 0          | 0          | 0               | 0          | 0               | 0               | 0          | 0          | 0               | 0          | 1          | 0          | 0               | 0          | 0          | 0          | 0          |
| <i>Platylesches picanini</i>                        | 0          | 0          | 0               | 0          | 0               | 0               | 0          | 0          | 0               | 0          | 0          | 1          | 0               | 0          | 0          | 1          | 1          |
| <i>Platylesches moritili</i>                        | 0          | 0          | 0               | 0          | 0               | 0               | 0          | 0          | 0               | 0          | 0          | 0          | 0               | 0          | 0          | 1          | 0          |
| <i>Hypoleucis tripunctata</i>                       | 0          | 0          | 0               | 0          | 0               | 0               | 0          | 0          | 0               | 0          | 0          | 0          | 1               | 0          | 0          | 0          | 0          |

| Butterfly family,<br>sub-family and species | Kal | Itw | Bu<br>g | Kis | Bu<br>d | Rw<br>e | Ech | Maf | Ka<br>g | Mat | Kit | Kas | Se<br>m | Kib | Bwi | Kei | Era |
|---------------------------------------------|-----|-----|---------|-----|---------|---------|-----|-----|---------|-----|-----|-----|---------|-----|-----|-----|-----|
| <i>Gretna cylindra</i>                      | 0   | 0   | 0       | 0   | 0       | 0       | 0   | 0   | 0       | 0   | 0   | 0   | 1       | 0   | 0   | 0   | 0   |
| <i>Astictopterus punctulactus</i>           | 0   | 0   | 0       | 0   | 0       | 0       | 0   | 0   | 0       | 0   | 0   | 0   | 0       | 0   | 0   | 1   | 0   |
| <i>Acada biseriatus</i>                     | 0   | 0   | 0       | 0   | 0       | 0       | 0   | 0   | 0       | 0   | 0   | 0   | 0       | 0   | 0   | 1   | 0   |

### Key

0 = absence of butterfly species

1 = Presence of butterfly species

Kal = Kalinzu-Maramagambo

Kag = Kagombe

Itw = Itwara

Mat = Matiri

Bug = Bugoma

Kit = Kitechura

Kis = Kisangi

Kas = Kasyoha-Kitomi

Bud = Budongo

Sem = Semliki

Rwe = Rwenzori

Kib = Kibale

Ech = Echuya

Bwi = Bwindi

Maf = Mafuga
